# Supplementary material for: An efficient and thermally stable Cr3+-activated Y2GdSc2Al2GaO12 garnet phosphor for NIR spectroscopy applications
Source: Royal Society of Chemistry journal article supplement (doi:10.1039/d3dt02481d), 2023-01-01
Supplement: d3dt02481d1.pdf [file d3dt02481d1.pdf]

## Supporting Information

### An Efficient and Thermally Stable Cr<sup>3+</sup>-activated Y<sub>2</sub>GdSc<sub>2</sub>Al<sub>2</sub>GaO<sub>12</sub>

#### Garnet Phosphor for NIR Spectroscopy Applications

Jihuan Xie<sup>a,b,c</sup>, Junhang Tian<sup>a,b,c</sup>, Lipeng Jiang<sup>d</sup>, Min Cao<sup>e</sup>, Weidong Zhuang<sup>a,b,c,\*</sup>

a State Key Laboratory of Advanced Metallurgy, University of Science and Technology Beijing, Beijing, 100083, China

b School of Metallurgical and Ecological Engineering, University of Science and Technology Beijing, Beijing 100083, China

c Beijing Key Laboratory for Green Recovery and Extraction of Rare and Precious Metals, University of Science and Technology Beijing, Beijing 100083, China

d Beijing Advanced Innovation Center for Materials Genome Engineering, Corrosion and Protection Center, University of Science and Technology Beijing, Beijing 100083, China

e Xi'an Rare Metal Materials Institute Co. Ltd., Xi'an 710016, China

\* Corresponding author. E-mail: wdzhuang@ustb.edu.cn

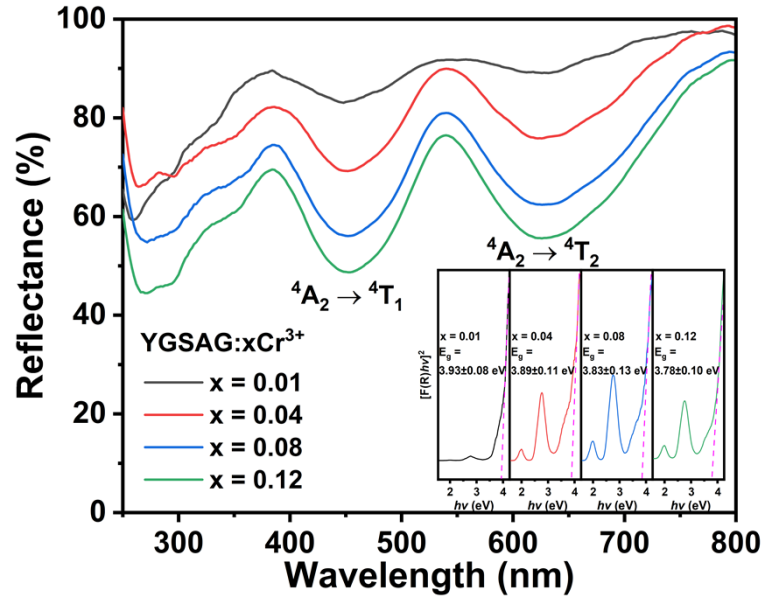

**Fig. S1.** Diffuse reflection spectra and bandgap values of selected YGSAG:xCr<sup>3+</sup> (x = 0.01, 0.04, 0.08, 0.12) phosphors.

**Table S1.** Atomic parameters of YGSAG:0.08Cr<sup>3+</sup> sample.

| Atom | x     | y      | z      | Wyck. | Occ.   | Uiso    |
|------|-------|--------|--------|-------|--------|---------|
| Y    | 0.125 | 0      | 0.25   | 24c   | 0.6667 | 0.01635 |
| Gd   | 0.125 | 0      | 0.25   | 24c   | 0.3333 | 0.01635 |
| Sc   | 0     | 0      | 0      | 16a   | 0.96   | 0.05978 |
| Cr   | 0     | 0      | 0      | 16a   | 0.04   | 0.05978 |
| Al   | 0.375 | 0      | 0.25   | 24d   | 0.6667 | 0.00246 |
| Ga   | 0.375 | 0      | 0.25   | 24d   | 0.3333 | 0.00246 |
| O    | 0.972 | 0.0539 | 0.1502 | 96h   | 1      | 0.01687 |

**Table S2.** Lattice parameters of YGSAG:xCr<sup>3+</sup> (x = 0.01-0.12) phosphors.

| YGSAG: xCr <sup>3+</sup> | a = b = c (Å) | $\alpha = \beta = \gamma$ (°) | V (Å <sup>3</sup> ) |
|--------------------------|---------------|-------------------------------|---------------------|
| x = 0.01                 | 13.01         | 90                            | 2202.07             |
| x = 0.02                 | 12.89         | 90                            | 2147.70             |
| x = 0.04                 | 12.78         | 90                            | 2087.34             |
| x = 0.06                 | 12.55         | 90                            | 1976.66             |
| x = 0.08                 | 12.38         | 90                            | 1897.41             |
| x = 0.10                 | 12.27         | 90                            | 1847.28             |
| x = 0.12                 | 12.13         | 90                            | 1784.77             |

### Calculation of AE and EQE:

The AE is defined as the ratio of the number of photons absorbed by the sample to that of excited photons, which be obtained via the equation below:

$$AE = \frac{\int E_R - \int E_S}{\int E_R} \times 100\%$$

where  $E_R$  and  $E_S$  represent the number of excitation photons and reflected photons from the BaSO<sub>4</sub> reference sample, respectively.

The IQE is defined as the ratio of the number of emitted photons to that of photons absorbed by the sample:

$$IQE = \frac{\int L_S}{\int E_R - \int E_S} \times 100\%$$

where  $L_S$  refers to the the number of emitted photons from the sample. The EQE is defined as the ratio of the number of emitted photons from the sample to that of excitation photons:

$$EQE = \frac{\int L_S}{\int E_R} \times 100\%$$

Therefore, the EQE can be also determined according to the following equation:

$$EQE = AE \times IQE \times 100\%$$
